# Supplementary material for: Exploratory Study of Signals for Asthma Drugs in Children, Using the EudraVigilance Database of Spontaneous Reports
Source: PubMed Central journal article supplement — Drug Saf. 2019 Oct 15;43(1):7–16. doi: 10.1007/s40264-019-00870-x (PMC6965046; doi:10.1007/s40264-019-00870-x), 2019-10-15
Supplement: 40264_2019_870_MOESM1_ESM.pdf [file 40264_2019_870_MOESM1_ESM.pdf]

## Supplement – list of all signals in children

| Event                                                | Reports | PRR (95% CI)     | SOC                                                  |
|------------------------------------------------------|---------|------------------|------------------------------------------------------|
| Salbutamol, inhaled (ATC code: R03AC02)              |         |                  |                                                      |
| Therapeutic and nontherapeutic responses             | 149     | 4.5 (3.9-5.3)    | General disorders and administration site conditions |
| Bronchospasm and obstruction                         | 143     | 11.5 (9.9-13.5)  | Respiratory, thoracic and mediastinal disorders      |
| Rate and rhythm disorders NEC                        | 135     | 7.6 (6.5-8.9)    | Cardiac disorders                                    |
| Breathing abnormalities                              | 123     | 3.2 (2.7-3.8)    | Respiratory, thoracic and mediastinal disorders      |
| Product quality issues NEC                           | 85      | 21.3 (17.3-26.2) | Product issues                                       |
| Product administration errors and issues             | 80      | 2.3 (1.8-2.8)    | Injury, poisoning and procedural complications       |
| Tremor (excl congenital)                             | 67      | 6.7 (5.3-8.5)    | Nervous system disorders                             |
| Supraventricular arrhythmias                         | 43      | 16.4 (12.1-22.0) | Cardiac disorders                                    |
| Anxiety symptoms                                     | 41      | 2.4 (1.8-3.2)    | Psychiatric disorders                                |
| Overdoses NEC                                        | 39      | 2.2 (1.6-3.0)    | Injury, poisoning and procedural complications       |
| Coughing and associated symptoms                     | 39      | 2.1 (1.6-2.9)    | Respiratory, thoracic and mediastinal disorders      |
| Potassium imbalance                                  | 38      | 17.4 (12.6-23.9) | Metabolism and nutrition disorders                   |
| Metabolic acidoses (excl diabetic acidoses)          | 38      | 11.7 (8.5-16.1)  | Metabolism and nutrition disorders                   |
| Cardiac signs and symptoms NEC                       | 36      | 2.8 (2.0-3.9)    | Cardiac disorders                                    |
| Medication errors, product use errors and issues NEC | 32      | 2.5 (1.8-3.6)    | Injury, poisoning and procedural complications       |
| Lower respiratory tract and lung infections          | 28      | 2.2 (1.5-3.2)    | Infections and infestations                          |
| Blood gas and acid base analyses                     | 28      | 6.6 (4.5-9.5)    | Investigations                                       |
| Heart rate and pulse investigations                  | 27      | 5.2 (3.6-7.6)    | Investigations                                       |
| Bullous conditions                                   | 26      | 1.7 (1.1-2.4)    | Skin and subcutaneous tissue disorders               |
| Off label uses                                       | 22      | 2.4 (1.6-3.7)    | Injury, poisoning and procedural complications       |
| Ventricular arrhythmias and cardiac arrest           | 20      | 2.8 (1.8-4.4)    | Cardiac disorders                                    |
| Respiratory tract disorders NEC                      | 18      | 4.3 (2.7-6.8)    | Respiratory, thoracic and mediastinal disorders      |
| Hyperglycaemic conditions NEC                        | 17      | 6.6 (4.1-10.6)   | Metabolism and nutrition disorders                   |
| Behaviour and socialisation disturbances             | 17      | 1.8 (1.1-2.9)    | Psychiatric disorders                                |
| Accidental exposures to product                      | 17      | 2.4 (1.5-3.9)    | Injury, poisoning and procedural complications       |

|                                                                     |    |                  |                                                      |
|---------------------------------------------------------------------|----|------------------|------------------------------------------------------|
| Conditions associated with abnormal gas exchange                    | 16 | 5.5 (3.3-8.9)    | Respiratory, thoracic and mediastinal disorders      |
| ECG investigations                                                  | 15 | 5.3 (3.2-8.8)    | Investigations                                       |
| Thermal burns                                                       | 13 | 35.4 (20.1-62.2) | Injury, poisoning and procedural complications       |
| Respiratory failures (excl neonatal)                                | 13 | 3.4 (2.0-5.8)    | Respiratory, thoracic and mediastinal disorders      |
| Poisoning and toxicity                                              | 13 | 1.8 (1.1-3.1)    | Injury, poisoning and procedural complications       |
| Interactions                                                        | 13 | 3.1 (1.8-5.3)    | General disorders and administration site conditions |
| Intentional product misuses                                         | 13 | 10.2 (5.9-17.7)  | Injury, poisoning and procedural complications       |
| Pupil disorders                                                     | 12 | 3.3 (1.9-5.8)    | Eye disorders                                        |
| Non-site specific vascular disorders NEC                            | 9  | 3.9 (2.0-7.5)    | Vascular disorders                                   |
| Psychotic disorder NEC                                              | 8  | 3.3 (1.6-6.6)    | Psychiatric disorders                                |
| Lower respiratory tract signs and symptoms                          | 8  | 4.1 (2.0-8.1)    | Infections and infestations                          |
| Device issues NEC                                                   | 8  | 7.0 (3.5-14.0)   | Product issues                                       |
| Carbohydrate tolerance analyses (incl diabetes)                     | 8  | 2.6 (1.3-5.1)    | Investigations                                       |
| Respiratory and pulmonary function diagnostic procedures            | 6  | 15.3 (6.8-34.5)  | Investigations                                       |
| Device malfunction events NEC                                       | 6  | 13.1 (5.8-29.6)  | Product issues                                       |
| Respiratory signs and symptoms NEC                                  | 5  | 9.5 (3.9-23.1)   | Respiratory, thoracic and mediastinal disorders      |
| Musculoskeletal and connective tissue disorders of limbs congenital | 5  | 2.5 (1.0-6.0)    | Musculoskeletal and connective tissue disorders      |
| Terbutaline (ATC code: R03AC03)                                     |    |                  |                                                      |
| Rate and rhythm disorders NEC                                       | 16 | 11.5 (7.5-17.8)  | Cardiac disorders                                    |
| Tremor (excl congenital)                                            | 9  | 11.6 (6.3-21.4)  | Nervous system disorders                             |
| Overdoses NEC                                                       | 5  | 3.7 (1.6-8.6)    | Injury, poisoning and procedural complications       |
| Gestational age and weight conditions                               | 5  | 9.2 (3.9-21.5)   | Pregnancy, puerperium and perinatal conditions       |
| Cardiac signs and symptoms NEC                                      | 5  | 5.0 (2.2-11.8)   | Cardiac disorders                                    |
| Salmeterol (ATC code: R03AC12)                                      |    |                  |                                                      |
| Rate and rhythm disorders NEC                                       | 6  | 9.8 (4.8-20.3)   | Cardiac disorders                                    |
| Formoterol (ATC code: R03AC13)                                      |    |                  |                                                      |
| Bronchospasm and obstruction                                        | 18 | 16.8 (11.2-25.3) | Respiratory, thoracic and mediastinal disorders      |
| Rate and rhythm disorders NEC                                       | 9  | 5.9 (3.2-10.9)   | Cardiac disorders                                    |
| Overdoses NEC                                                       | 7  | 4.7 (2.3-9.6)    | Injury, poisoning and procedural complications       |
| Exposures associated with pregnancy,                                | 6  | 4.0 (1.8-8.6)    | Injury, poisoning and procedural                     |

|                                                              |     |                   |                                                      |
|--------------------------------------------------------------|-----|-------------------|------------------------------------------------------|
| delivery and lactation                                       |     |                   | complications                                        |
| Coughing and associated symptoms                             | 5   | 3.2 (1.4-7.5)     | Respiratory, thoracic and mediastinal disorders      |
| Salmeterol + fluticasone (ATC code: R03AK06)                 |     |                   |                                                      |
| Bronchospasm and obstruction                                 | 154 | 20.9 (18.2-24.0)  | Respiratory, thoracic and mediastinal disorders      |
| Therapeutic and nontherapeutic responses                     | 61  | 3.1 (2.4-3.9)     | General disorders and administration site conditions |
| Product quality issues NEC                                   | 54  | 22.3 (17.2-28.8)  | Product issues                                       |
| Coughing and associated symptoms                             | 54  | 4.9 (3.8-6.4)     | Respiratory, thoracic and mediastinal disorders      |
| Breathing abnormalities                                      | 42  | 1.8 (1.4-2.4)     | Respiratory, thoracic and mediastinal disorders      |
| Product administration errors and issues                     | 40  | 1.9 (1.4-2.6)     | Injury, poisoning and procedural complications       |
| Upper respiratory tract signs and symptoms                   | 36  | 4.6 (3.4-6.3)     | Respiratory, thoracic and mediastinal disorders      |
| Overdoses NEC                                                | 30  | 2.9 (2.0-4.1)     | Injury, poisoning and procedural complications       |
| Headaches NEC                                                | 30  | 1.5 (1.1-2.1)     | Nervous system disorders                             |
| Adrenal cortical hypofunctions                               | 30  | 57.4 (39.9-82.6)  | Metabolism and nutrition disorders                   |
| Lower respiratory tract and lung infections                  | 26  | 3.4 (2.4-5.0)     | Infections and infestations                          |
| Rate and rhythm disorders NEC                                | 23  | 2.1 (1.4-3.2)     | Cardiac disorders                                    |
| Off label uses                                               | 23  | 4.3 (2.8-6.4)     | Injury, poisoning and procedural complications       |
| Behaviour and socialisation disturbances                     | 23  | 4.1 (2.7-6.1)     | Psychiatric disorders                                |
| Musculoskeletal and connective tissue signs and symptoms NEC | 21  | 4.7 (3.1-7.1)     | Musculoskeletal and connective tissue disorders      |
| Upper respiratory tract infections                           | 19  | 1.9 (1.2-2.9)     | Infections and infestations                          |
| Anxiety symptoms                                             | 18  | 1.8 (1.1-2.8)     | Psychiatric disorders                                |
| Abnormal behaviour NEC                                       | 18  | 3.1 (2.0-4.9)     | Psychiatric disorders                                |
| Cardiac signs and symptoms NEC                               | 16  | 2.1 (1.3-3.4)     | Cardiac disorders                                    |
| Parasomnias                                                  | 13  | 7.8 (4.6-13.5)    | Psychiatric disorders                                |
| Adrenal cortex tests                                         | 13  | 71.9 (40.8-126.7) | Investigations                                       |
| Oral soft tissue swelling and oedema                         | 12  | 3.7 (2.1-6.5)     | Gastrointestinal disorders                           |
| Adrenal cortical hyperfunctions                              | 11  | 19.2 (10.6-34.8)  | Metabolism and nutrition disorders                   |
| Visual disorders NEC                                         | 10  | 2.2 (1.2-4.2)     | Eye disorders                                        |
| Ventricular arrhythmias and cardiac arrest                   | 9   | 2.1 (1.1-4.1)     | Cardiac disorders                                    |
| Increased intracranial pressure disorders                    | 9   | 4.3 (2.2-8.2)     | Nervous system disorders                             |

|                                                         |    |                  |                                                      |
|---------------------------------------------------------|----|------------------|------------------------------------------------------|
| Glaucomas (excl congenital)                             | 9  | 34.0 (17.5-66.2) | Eye disorders                                        |
| Therapeutic procedures NEC                              | 8  | 3.6 (1.8-7.1)    | General disorders and administration site conditions |
| Sleep disorders NEC                                     | 7  | 2.8 (1.4-5.9)    | Psychiatric disorders                                |
| Interactions                                            | 7  | 2.8 (1.3-5.8)    | General disorders and administration site conditions |
| Hypoglycaemic conditions NEC                            | 7  | 2.9 (1.4-6.0)    | Metabolism and nutrition disorders                   |
| Confusion and disorientation                            | 7  | 2.2 (1.0-4.5)    | Psychiatric disorders                                |
| Cataract conditions                                     | 7  | 23.6 (11.2-50.0) | Eye disorders                                        |
| Tic disorders                                           | 6  | 5.7 (2.6-12.7)   | Psychiatric disorders                                |
| Oral soft tissue disorders NEC                          | 6  | 7.0 (3.1-15.5)   | Gastrointestinal disorders                           |
| Ischaemic coronary artery disorders                     | 6  | 12.1 (5.4-27.0)  | Cardiac disorders                                    |
| Supraventricular arrhythmias                            | 5  | 3.1 (1.3-7.4)    | Cardiac disorders                                    |
| Skin hypoplasias and atrophies                          | 5  | 20.3 (8.4-49.3)  | Skin and subcutaneous tissue disorders               |
| Optic disc abnormalities NEC                            | 5  | 7.4 (3.1-17.7)   | Eye disorders                                        |
| Memory loss (excl dementia)                             | 5  | 3.1 (1.3-7.4)    | Nervous system disorders                             |
| Candida infections                                      | 5  | 6.1 (2.5-14.6)   | Infections and infestations                          |
| Formoterol + budesonide (ATC code: R03AK07)             |    |                  |                                                      |
| Bronchospasm and obstruction                            | 43 | 20.1 (15.5-25.9) | Respiratory, thoracic and mediastinal disorders      |
| Therapeutic and nontherapeutic responses                | 18 | 3.2 (2.1-4.9)    | General disorders and administration site conditions |
| Product administration errors and issues                | 16 | 2.7 (1.7-4.3)    | Injury, poisoning and procedural complications       |
| Medication errors, product use errors and issues NEC    | 14 | 6.5 (4.0-10.8)   | Injury, poisoning and procedural complications       |
| Breathing abnormalities                                 | 14 | 2.1 (1.3-3.5)    | Respiratory, thoracic and mediastinal disorders      |
| Coughing and associated symptoms                        | 12 | 3.8 (2.2-6.6)    | Respiratory, thoracic and mediastinal disorders      |
| Off label uses                                          | 11 | 7.1 (4.0-12.6)   | Injury, poisoning and procedural complications       |
| Headaches NEC                                           | 11 | 1.9 (1.1-3.4)    | Nervous system disorders                             |
| Upper respiratory tract signs and symptoms              | 9  | 4.0 (2.1-7.6)    | Respiratory, thoracic and mediastinal disorders      |
| Physical examination procedures and organ system status | 9  | 2.8 (1.5-5.2)    | Investigations                                       |
| Tremor (excl congenital)                                | 6  | 3.5 (1.6-7.7)    | Nervous system disorders                             |
| Suicidal and self-injurious behaviour                   | 6  | 2.6 (1.2-5.7)    | Psychiatric disorders                                |
| Lower respiratory tract and lung infections             | 6  | 2.8 (1.3-6.1)    | Infections and infestations                          |
| Intentional product misuses                             | 5  | 22.8 (9.6-54.3)  | Injury, poisoning and procedural complications       |
| Allergies to foods, food additives,                     | 5  | 9.7 (4.1-22.9)   | Immune system disorders                              |

drugs and other chemicals

Ipratropium bromide (ATC code: R03BA01)

|                                                              |    |                 |                                                 |
|--------------------------------------------------------------|----|-----------------|-------------------------------------------------|
| Bronchospasm and obstruction                                 | 20 | 8.8 (5.9-13.4)  | Respiratory, thoracic and mediastinal disorders |
| Urticarias                                                   | 15 | 2.6 (1.6-4.3)   | Immune system disorders                         |
| Coughing and associated symptoms                             | 13 | 4.0 (2.3-6.7)   | Respiratory, thoracic and mediastinal disorders |
| Anxiety symptoms                                             | 10 | 3.3 (1.8-6.0)   | Psychiatric disorders                           |
| Erythemas                                                    | 9  | 2.2 (1.1-4.1)   | Skin and subcutaneous tissue disorders          |
| Pruritus NEC                                                 | 8  | 2.2 (1.1-4.3)   | Skin and subcutaneous tissue disorders          |
| Musculoskeletal and connective tissue signs and symptoms NEC | 8  | 5.9 (3.0-11.7)  | Musculoskeletal and connective tissue disorders |
| Upper respiratory tract signs and symptoms                   | 7  | 3.0 (1.4-6.2)   | Respiratory, thoracic and mediastinal disorders |
| Suicidal and self-injurious behaviour                        | 7  | 2.9 (1.4-5.9)   | Psychiatric disorders                           |
| Sleep disorders NEC                                          | 6  | 8.1 (3.7-17.8)  | Psychiatric disorders                           |
| Behaviour and socialisation disturbances                     | 6  | 3.5 (1.6-7.7)   | Psychiatric disorders                           |
| Off label uses                                               | 5  | 3.1 (1.3-7.3)   | Injury, poisoning and procedural complications  |
| Candida infections                                           | 5  | 20.4 (8.6-48.6) | Infections and infestations                     |
| Abnormal behaviour NEC                                       | 5  | 2.9 (1.2-6.8)   | Psychiatric disorders                           |

Budesonide (ATC code: R03BA02)

|                                                      |     |                  |                                                      |
|------------------------------------------------------|-----|------------------|------------------------------------------------------|
| Bronchospasm and obstruction                         | 103 | 13.4 (11.2-16.0) | Respiratory, thoracic and mediastinal disorders      |
| Breathing abnormalities                              | 56  | 2.4 (1.8-3.0)    | Respiratory, thoracic and mediastinal disorders      |
| Coughing and associated symptoms                     | 44  | 3.9 (2.9-5.2)    | Respiratory, thoracic and mediastinal disorders      |
| Therapeutic and nontherapeutic responses             | 43  | 2.1 (1.6-2.8)    | General disorders and administration site conditions |
| Upper respiratory tract signs and symptoms           | 28  | 3.5 (2.4-5.0)    | Respiratory, thoracic and mediastinal disorders      |
| Medication errors, product use errors and issues NEC | 28  | 3.6 (2.5-5.2)    | Injury, poisoning and procedural complications       |
| Lower respiratory tract and lung infections          | 24  | 3.1 (2.1-4.5)    | Infections and infestations                          |
| Upper respiratory tract infections                   | 22  | 2.1 (1.4-3.2)    | Infections and infestations                          |
| Adrenal cortical hypofunctions                       | 22  | 39.8 (26.1-60.7) | Metabolism and nutrition disorders                   |
| Off label uses                                       | 21  | 3.8 (2.5-5.7)    | Injury, poisoning and procedural complications       |
| Behaviour and socialisation disturbances             | 21  | 3.6 (2.4-5.5)    | Psychiatric disorders                                |

|                                                              |    |                  |                                                      |
|--------------------------------------------------------------|----|------------------|------------------------------------------------------|
| Anxiety symptoms                                             | 21 | 2.0 (1.3-3.0)    | Psychiatric disorders                                |
| Allergic conditions NEC                                      | 18 | 2.0 (1.3-3.2)    | Immune system disorders                              |
| Musculoskeletal and connective tissue signs and symptoms NEC | 17 | 3.7 (2.3-5.8)    | Musculoskeletal and connective tissue disorders      |
| Cataract conditions                                          | 17 | 58.5 (35.8-95.5) | Eye disorders                                        |
| Emotional and mood disturbances NEC                          | 16 | 1.6 (1.0-2.6)    | Psychiatric disorders                                |
| Cardiac signs and symptoms NEC                               | 16 | 2.0 (1.2-3.3)    | Cardiac disorders                                    |
| Adrenal cortical hyperfunctions                              | 14 | 23.8 (14.1-40.4) | Metabolism and nutrition disorders                   |
| Interactions                                                 | 12 | 4.6 (2.7-8.2)    | General disorders and administration site conditions |
| Viral infections NEC                                         | 11 | 2.3 (1.3-4.1)    | Infections and infestations                          |
| White blood cell analyses                                    | 10 | 3.0 (1.6-5.6)    | Investigations                                       |
| Gestational age and weight conditions                        | 10 | 2.3 (1.2-4.3)    | Pregnancy, puerperium and perinatal conditions       |
| Psychotic disorder NEC                                       | 9  | 6.0 (3.1-11.6)   | Psychiatric disorders                                |
| Immune and associated conditions NEC                         | 9  | 3.5 (1.9-6.8)    | Immune system disorders                              |
| Heart rate and pulse investigations                          | 9  | 2.8 (1.5-5.3)    | Investigations                                       |
| Conditions associated with abnormal gas exchange             | 9  | 4.9 (2.6-9.5)    | Respiratory, thoracic and mediastinal disorders      |
| Leukopenias NEC                                              | 8  | 3.5 (1.7-6.9)    | Immune system disorders                              |
| Candida infections                                           | 8  | 9.5 (4.7-19.0)   | Infections and infestations                          |
| Adrenal cortex tests                                         | 8  | 41.1 (20.2-83.6) | Investigations                                       |
| Respiratory tract disorders NEC                              | 7  | 2.7 (1.3-5.6)    | Respiratory, thoracic and mediastinal disorders      |
| Intentional product misuses                                  | 7  | 8.8 (4.2-18.5)   | Injury, poisoning and procedural complications       |
| Stomatitis and ulceration                                    | 6  | 3.0 (1.4-6.7)    | Gastrointestinal disorders                           |
| Cardiac septal defects congenital                            | 6  | 3.8 (1.7-8.5)    | Cardiac disorders                                    |
| Pseudomonal infections                                       | 5  | 14.7 (6.1-35.5)  | Infections and infestations                          |
| Pituitary analyses anterior                                  | 5  | 8.4 (3.5-20.1)   | Investigations                                       |
| Metabolic bone disorders                                     | 5  | 12.7 (5.3-30.6)  | Musculoskeletal and connective tissue disorders      |
| Hypertrichoses                                               | 5  | 17.8 (7.3-43.1)  | Skin and subcutaneous tissue disorders               |

#### Fluticasone (ATC code: R03BA05)

|                                             |    |                  |                                                      |
|---------------------------------------------|----|------------------|------------------------------------------------------|
| Bronchospasm and obstruction                | 68 | 13.1 (10.5-16.3) | Respiratory, thoracic and mediastinal disorders      |
| Therapeutic and nontherapeutic responses    | 34 | 2.5 (1.8-3.4)    | General disorders and administration site conditions |
| Behaviour and socialisation disturbances    | 32 | 8.2 (5.9-11.4)   | Psychiatric disorders                                |
| Lower respiratory tract and lung infections | 30 | 5.7 (4.1-8.1)    | Infections and infestations                          |

|                                                              |    |                   |                                                 |
|--------------------------------------------------------------|----|-------------------|-------------------------------------------------|
| Coughing and associated symptoms                             | 30 | 3.9 (2.8-5.6)     | Respiratory, thoracic and mediastinal disorders |
| Product administration errors and issues                     | 26 | 1.8 (1.2-2.6)     | Injury, poisoning and procedural complications  |
| Product quality issues NEC                                   | 25 | 14.6 (10.0-21.5)  | Product issues                                  |
| Adrenal cortical hypofunctions                               | 22 | 59.5 (39.1-90.4)  | Metabolism and nutrition disorders              |
| Upper respiratory tract infections                           | 20 | 2.8 (1.9-4.4)     | Infections and infestations                     |
| Anxiety symptoms                                             | 20 | 2.8 (1.8-4.3)     | Psychiatric disorders                           |
| Abnormal behaviour NEC                                       | 19 | 4.7 (3.0-7.3)     | Psychiatric disorders                           |
| Overdoses NEC                                                | 18 | 2.5 (1.6-3.9)     | Injury, poisoning and procedural complications  |
| Off label uses                                               | 18 | 4.8 (3.1-7.6)     | Injury, poisoning and procedural complications  |
| Musculoskeletal and connective tissue signs and symptoms NEC | 18 | 5.8 (3.7-9.1)     | Musculoskeletal and connective tissue disorders |
| Emotional and mood disturbances NEC                          | 17 | 2.6 (1.6-4.1)     | Psychiatric disorders                           |
| Upper respiratory tract signs and symptoms                   | 16 | 3.0 (1.8-4.8)     | Respiratory, thoracic and mediastinal disorders |
| Physical examination procedures and organ system status      | 14 | 1.8 (1.1-3.0)     | Investigations                                  |
| Dyskinesias and movement disorders NEC                       | 13 | 2.3 (1.3-3.9)     | Nervous system disorders                        |
| Allergic conditions NEC                                      | 11 | 1.8 (1.0-3.3)     | Immune system disorders                         |
| Increased physical activity levels                           | 8  | 2.4 (1.2-4.8)     | Psychiatric disorders                           |
| Nasal disorders NEC                                          | 7  | 5.0 (2.4-10.5)    | Respiratory, thoracic and mediastinal disorders |
| Disturbances in initiating and maintaining sleep             | 7  | 2.4 (1.1-5.0)     | Psychiatric disorders                           |
| Cataract conditions                                          | 7  | 34.1 (16.2-72.1)  | Eye disorders                                   |
| Adrenal cortical hyperfunctions                              | 7  | 17.5 (8.3-36.7)   | Metabolism and nutrition disorders              |
| Ocular disorders NEC                                         | 6  | 2.3 (1.0-5.1)     | Eye disorders                                   |
| Bone disorders NEC                                           | 6  | 10.3 (4.6-22.9)   | Musculoskeletal and connective tissue disorders |
| Adrenal cortex tests                                         | 6  | 45.3 (20.1-102.1) | Investigations                                  |
| Mental impairment (excl dementia and memory loss)            | 5  | 2.8 (1.2-6.6)     | Psychiatric disorders                           |
| Hypoglycaemic conditions NEC                                 | 5  | 2.9 (1.2-7.1)     | Metabolism and nutrition disorders              |
| General nutritional disorders NEC                            | 5  | 2.9 (1.2-6.9)     | Metabolism and nutrition disorders              |
| Dental and periodontal infections and inflammations          | 5  | 46.2 (18.9-112.7) | Gastrointestinal disorders                      |
| Mometasone (ATC code: R03BA07)                               |    |                   |                                                 |

|                                                 |     |                  |                                                      |
|-------------------------------------------------|-----|------------------|------------------------------------------------------|
| Breathing abnormalities                         | 8   | 6.3 (3.5-11.5)   | Respiratory, thoracic and mediastinal disorders      |
| Rashes, eruptions and exanthems NEC             | 6   | 2.6 (1.3-5.4)    | Skin and subcutaneous tissue disorders               |
| Product administration errors and issues        | 5   | 4.3 (1.9-9.7)    | Injury, poisoning and procedural complications       |
| <b>Ciclesonide (ATC code: R03BA08)</b>          |     |                  |                                                      |
| Bronchospasm and obstruction                    | 10  | 20.7 (12.2-35.1) | Respiratory, thoracic and mediastinal disorders      |
| Breathing abnormalities                         | 5   | 3.4 (1.5-7.7)    | Respiratory, thoracic and mediastinal disorders      |
| <b>Ipratropium bromide (ATC code: R03BB01)</b>  |     |                  |                                                      |
| Rate and rhythm disorders NEC                   | 15  | 9.3 (5.9-14.7)   | Cardiac disorders                                    |
| Urticarias                                      | 8   | 2.8 (1.4-5.4)    | Immune system disorders                              |
| Pupil disorders                                 | 8   | 24.3 (12.6-47.1) | Eye disorders                                        |
| Product administration errors and issues        | 8   | 2.5 (1.3-4.9)    | Injury, poisoning and procedural complications       |
| Erythemas                                       | 7   | 3.3 (1.6-6.8)    | Skin and subcutaneous tissue disorders               |
| Anaphylactic and anaphylactoid responses        | 7   | 4.6 (2.3-9.4)    | Immune system disorders                              |
| Tremor (excl congenital)                        | 6   | 6.6 (3.1-14.3)   | Nervous system disorders                             |
| Coughing and associated symptoms                | 6   | 3.6 (1.7-7.8)    | Respiratory, thoracic and mediastinal disorders      |
| <b>Cromoglicic acid (ATC code: R03BC01)</b>     |     |                  |                                                      |
| Bronchospasm and obstruction                    | 7   | 15.4 (7.9-29.7)  | Respiratory, thoracic and mediastinal disorders      |
| Breathing abnormalities                         | 6   | 4.3 (2.1-8.9)    | Respiratory, thoracic and mediastinal disorders      |
| <b>Salbutamol, systemic (ATC code: R03CC02)</b> |     |                  |                                                      |
| Rate and rhythm disorders NEC                   | 102 | 8.0 (6.7-9.6)    | Cardiac disorders                                    |
| Bronchospasm and obstruction                    | 94  | 10.5 (8.7-12.7)  | Respiratory, thoracic and mediastinal disorders      |
| Breathing abnormalities                         | 75  | 2.7 (2.2-3.4)    | Respiratory, thoracic and mediastinal disorders      |
| Therapeutic and nontherapeutic responses        | 69  | 2.9 (2.3-3.7)    | General disorders and administration site conditions |
| Tremor (excl congenital)                        | 49  | 6.9 (5.2-9.0)    | Nervous system disorders                             |
| Product administration errors and issues        | 46  | 1.8 (1.4-2.4)    | Injury, poisoning and procedural complications       |
| Supraventricular arrhythmias                    | 38  | 20.2 (14.7-27.6) | Cardiac disorders                                    |
| Metabolic acidoses (excl diabetic acidoses)     | 37  | 16.0 (11.6-22.0) | Metabolism and nutrition disorders                   |
| Urticarias                                      | 35  | 1.5 (1.1-2.1)    | Immune system disorders                              |
| Potassium imbalance                             | 35  | 22.3 (16.1-31.1) | Metabolism and nutrition disorders                   |



|                                                      |    |                |                                                      |
|------------------------------------------------------|----|----------------|------------------------------------------------------|
| Anxiety symptoms                                     | 33 | 2.7 (1.9-3.8)  | Psychiatric disorders                                |
| Overdoses NEC                                        | 31 | 2.5 (1.8-3.5)  | Injury, poisoning and procedural complications       |
| Coughing and associated symptoms                     | 30 | 2.3 (1.6-3.2)  | Respiratory, thoracic and mediastinal disorders      |
| Cardiac signs and symptoms NEC                       | 30 | 3.3 (2.3-4.7)  | Cardiac disorders                                    |
| Product quality issues NEC                           | 28 | 9.5 (6.6-13.7) | Product issues                                       |
| Bullous conditions                                   | 24 | 2.2 (1.5-3.2)  | Skin and subcutaneous tissue disorders               |
| Heart rate and pulse investigations                  | 23 | 6.2 (4.1-9.3)  | Investigations                                       |
| Medication errors, product use errors and issues NEC | 22 | 2.4 (1.6-3.7)  | Injury, poisoning and procedural complications       |
| Lower respiratory tract and lung infections          | 19 | 2.1 (1.3-3.3)  | Infections and infestations                          |
| Blood gas and acid base analyses                     | 18 | 5.9 (3.7-9.3)  | Investigations                                       |
| Respiratory tract disorders NEC                      | 15 | 5.0 (3.0-8.2)  | Respiratory, thoracic and mediastinal disorders      |
| Off label uses                                       | 15 | 2.3 (1.4-3.8)  | Injury, poisoning and procedural complications       |
| ECG investigations                                   | 15 | 7.4 (4.5-12.3) | Investigations                                       |
| Hyperglycaemic conditions NEC                        | 14 | 7.6 (4.5-12.8) | Metabolism and nutrition disorders                   |
| Ventricular arrhythmias and cardiac arrest           | 13 | 2.6 (1.5-4.4)  | Cardiac disorders                                    |
| Vascular hypotensive disorders                       | 13 | 2.1 (1.2-3.6)  | Vascular disorders                                   |
| Poisoning and toxicity                               | 13 | 2.5 (1.5-4.3)  | Injury, poisoning and procedural complications       |
| Conditions associated with abnormal gas exchange     | 13 | 6.2 (3.6-10.6) | Respiratory, thoracic and mediastinal disorders      |
| Behaviour and socialisation disturbances             | 13 | 1.9 (1.1-3.3)  | Psychiatric disorders                                |
| Respiratory failures (excl neonatal)                 | 11 | 4.0 (2.2-7.2)  | Respiratory, thoracic and mediastinal disorders      |
| Perception disturbances                              | 11 | 1.8 (1.0-3.3)  | Psychiatric disorders                                |
| Pupil disorders                                      | 10 | 3.8 (2.1-7.1)  | Eye disorders                                        |
| Interactions                                         | 9  | 3.0 (1.6-5.8)  | General disorders and administration site conditions |
| Psychotic disorder NEC                               | 8  | 4.6 (2.3-9.2)  | Psychiatric disorders                                |
| Device issues NEC                                    | 7  | 8.5 (4.1-17.9) | Product issues                                       |
| Non-site specific vascular disorders NEC             | 6  | 3.6 (1.6-8.1)  | Vascular disorders                                   |
| Lower respiratory tract signs and symptoms           | 6  | 4.3 (1.9-9.5)  | Infections and infestations                          |
| Intentional product misuses                          | 6  | 6.5 (2.9-14.5) | Injury, poisoning and procedural complications       |
| Carbohydrate tolerance analyses (incl                | 6  | 2.7 (1.2-6.0)  | Investigations                                       |

|                                                             |     |                  |                                                      |
|-------------------------------------------------------------|-----|------------------|------------------------------------------------------|
| diabetes)                                                   |     |                  |                                                      |
| Thermal burns                                               | 5   | 18.1 (7.4-43.9)  | Injury, poisoning and procedural complications       |
| Respiratory signs and symptoms NEC                          | 5   | 13.3 (5.5-32.3)  | Respiratory, thoracic and mediastinal disorders      |
| Terbutaline, systemic (ATC code: R03CC03)                   |     |                  |                                                      |
| Rate and rhythm disorders NEC                               | 22  | 13.3 (9.3-19.1)  | Cardiac disorders                                    |
| Tremor (excl congenital)                                    | 11  | 11.9 (6.8-20.7)  | Nervous system disorders                             |
| Overdoses NEC                                               | 9   | 5.6 (3.0-10.4)   | Injury, poisoning and procedural complications       |
| Potassium imbalance                                         | 6   | 28.8 (13.3-62.6) | Metabolism and nutrition disorders                   |
| Gestational age and weight conditions                       | 6   | 9.3 (4.3-20.1)   | Pregnancy, puerperium and perinatal conditions       |
| Theophylline (ATC code: R03DA04)                            |     |                  |                                                      |
| Seizures and seizure disorders NEC                          | 27  | 4.3 (3.1-6.0)    | Nervous system disorders                             |
| Nausea and vomiting symptoms                                | 20  | 2.8 (1.9-4.1)    | Gastrointestinal disorders                           |
| Rate and rhythm disorders NEC                               | 12  | 6.4 (3.8-10.9)   | Cardiac disorders                                    |
| Breathing abnormalities                                     | 12  | 3.0 (1.8-5.1)    | Respiratory, thoracic and mediastinal disorders      |
| Poisoning and toxicity                                      | 10  | 13.4 (7.5-24.2)  | Injury, poisoning and procedural complications       |
| Bronchospasm and obstruction                                | 9   | 6.8 (3.7-12.8)   | Respiratory, thoracic and mediastinal disorders      |
| Therapeutic drug monitoring analyses                        | 8   | 17.4 (8.9-33.8)  | Investigations                                       |
| Overdoses NEC                                               | 8   | 4.4 (2.3-8.6)    | Injury, poisoning and procedural complications       |
| Potassium imbalance                                         | 7   | 29.9 (14.6-61.3) | Metabolism and nutrition disorders                   |
| Interactions                                                | 6   | 13.8 (6.4-30.1)  | General disorders and administration site conditions |
| Exposures associated with pregnancy, delivery and lactation | 6   | 3.3 (1.5-7.1)    | Injury, poisoning and procedural complications       |
| Encephalopathies NEC                                        | 6   | 9.8 (4.5-21.4)   | Nervous system disorders                             |
| Dyskinesias and movement disorders NEC                      | 5   | 3.5 (1.5-8.3)    | Nervous system disorders                             |
| Abnormal behaviour NEC                                      | 5   | 4.9 (2.1-11.6)   | Psychiatric disorders                                |
| Zafirlukast (ATC code: R03DC01)                             |     |                  |                                                      |
| Interactions                                                | 5   | 38.9 (17.5-86.5) | General disorders and administration site conditions |
| Bronchospasm and obstruction                                | 5   | 12.9 (5.8-28.5)  | Respiratory, thoracic and mediastinal disorders      |
| Montelukast (ATC code: R03DC03)                             |     |                  |                                                      |
| Overdoses NEC                                               | 350 | 8.9 (8.1-9.9)    | Injury, poisoning and procedural complications       |
| Behaviour and socialisation                                 | 328 | 16.0 (14.4-17.8) | Psychiatric disorders                                |

|                                                                |     |                  |                                                         |
|----------------------------------------------------------------|-----|------------------|---------------------------------------------------------|
| disturbances                                                   |     |                  |                                                         |
| Parasomnias                                                    | 252 | 49.5 (43.3-56.6) | Psychiatric disorders                                   |
| Anxiety symptoms                                               | 249 | 6.4 (5.7-7.2)    | Psychiatric disorders                                   |
| Emotional and mood disturbances<br>NEC                         | 247 | 6.9 (6.1-7.7)    | Psychiatric disorders                                   |
| Suicidal and self-injurious behaviour                          | 219 | 7.1 (6.3-8.1)    | Psychiatric disorders                                   |
| Abnormal behaviour NEC                                         | 211 | 9.7 (8.5-11.1)   | Psychiatric disorders                                   |
| Disturbances in initiating and<br>maintaining sleep            | 163 | 10.4 (8.9-12.1)  | Psychiatric disorders                                   |
| Perception disturbances                                        | 153 | 8.0 (6.9-9.4)    | Psychiatric disorders                                   |
| Depressive disorders                                           | 142 | 10.2 (8.6-12.0)  | Psychiatric disorders                                   |
| Headaches NEC                                                  | 123 | 1.6 (1.3-1.9)    | Nervous system disorders                                |
| Product administration errors and<br>issues                    | 118 | 1.4 (1.2-1.7)    | Injury, poisoning and procedural<br>complications       |
| Adverse effect absent                                          | 118 | 4.1 (3.4-4.9)    | General disorders and<br>administration site conditions |
| Gastrointestinal and abdominal pains<br>(excl oral and throat) | 116 | 2.1 (1.8-2.5)    | Gastrointestinal disorders                              |
| Dyskinesias and movement disorders<br>NEC                      | 100 | 3.2 (2.6-3.8)    | Nervous system disorders                                |
| Bronchospasm and obstruction                                   | 95  | 3.2 (2.7-4.0)    | Respiratory, thoracic and<br>mediastinal disorders      |
| Fear symptoms and phobic disorders<br>(incl social phobia)     | 72  | 27.5 (21.5-35.1) | Psychiatric disorders                                   |
| Mood alterations with depressive<br>symptoms                   | 67  | 8.0 (6.3-10.2)   | Psychiatric disorders                                   |
| Sleep disorders NEC                                            | 66  | 7.0 (5.5-9.0)    | Psychiatric disorders                                   |
| Increased physical activity levels                             | 63  | 3.4 (2.7-4.3)    | Psychiatric disorders                                   |
| Speech articulation and rhythm<br>disturbances                 | 61  | 6.3 (4.9-8.1)    | Psychiatric disorders                                   |
| Feelings and sensations NEC                                    | 61  | 1.8 (1.4-2.2)    | General disorders and<br>administration site conditions |
| Fluctuating mood symptoms                                      | 59  | 20.6 (15.8-26.9) | Psychiatric disorders                                   |
| Coughing and associated symptoms                               | 56  | 1.3 (1.0-1.7)    | Respiratory, thoracic and<br>mediastinal disorders      |
| Musculoskeletal and connective<br>tissue pain and discomfort   | 48  | 1.4 (1.1-1.9)    | Musculoskeletal and connective<br>tissue disorders      |
| Tremor (excl congenital)                                       | 45  | 1.9 (1.4-2.6)    | Nervous system disorders                                |
| Mental impairment (excl dementia<br>and memory loss)           | 45  | 4.5 (3.3-6.0)    | Psychiatric disorders                                   |
| Paraesthesias and dysaesthesias                                | 43  | 2.0 (1.5-2.7)    | Nervous system disorders                                |
| Nasal disorders NEC                                            | 43  | 5.6 (4.1-7.5)    | Respiratory, thoracic and<br>mediastinal disorders      |
| Upper respiratory tract signs and<br>symptoms                  | 42  | 1.4 (1.0-1.9)    | Respiratory, thoracic and<br>mediastinal disorders      |
| Attention deficit and disruptive                               | 33  | 14.8 (10.4-21.0) | Psychiatric disorders                                   |

|                                             |    |                   |                                                      |
|---------------------------------------------|----|-------------------|------------------------------------------------------|
| behaviour disorders                         |    |                   |                                                      |
| Tic disorders                               | 32 | 8.1 (5.7-11.5)    | Psychiatric disorders                                |
| Obsessive-compulsive disorders and symptoms | 32 | 14.8 (10.4-21.3)  | Psychiatric disorders                                |
| Mood disorders NEC                          | 32 | 2.5 (1.7-3.5)     | Psychiatric disorders                                |
| Product quality issues NEC                  | 31 | 3.2 (2.3-4.6)     | Product issues                                       |
| Panic attacks and disorders                 | 30 | 10.7 (7.4-15.5)   | Psychiatric disorders                                |
| Muscle related signs and symptoms NEC       | 29 | 1.7 (1.2-2.4)     | Musculoskeletal and connective tissue disorders      |
| Thinking disturbances                       | 28 | 15.4 (10.5-22.7)  | Psychiatric disorders                                |
| Confusion and disorientation                | 25 | 2.0 (1.3-2.9)     | Psychiatric disorders                                |
| Mental disorders NEC                        | 23 | 5.8 (3.8-8.7)     | Psychiatric disorders                                |
| Sleep disturbances NEC                      | 22 | 4.6 (3.0-7.0)     | Psychiatric disorders                                |
| Affect alterations NEC                      | 21 | 9.3 (6.0-14.4)    | General disorders and administration site conditions |
| Personality disorders NEC                   | 20 | 23.3 (14.6-37.1)  | Psychiatric disorders                                |
| Psychotic disorder NEC                      | 18 | 3.2 (2.0-5.1)     | Psychiatric disorders                                |
| Educational issues                          | 18 | 26.0 (15.8-42.6)  | Social circumstances                                 |
| Psychiatric elimination disorders           | 17 | 12.7 (7.8-20.8)   | Psychiatric disorders                                |
| Skin injuries NEC                           | 15 | 2.2 (1.3-3.7)     | Skin and subcutaneous tissue disorders               |
| Gastrointestinal disorders NEC              | 15 | 2.9 (1.8-4.9)     | Gastrointestinal disorders                           |
| Product confusion errors and issues         | 14 | 37.2 (20.9-66.3)  | Injury, poisoning and procedural complications       |
| Memory loss (excl dementia)                 | 14 | 2.2 (1.3-3.8)     | Nervous system disorders                             |
| Vasculitides                                | 13 | 90.7 (46.3-177.9) | Vascular disorders                                   |
| Sensory abnormalities NEC                   | 13 | 2.2 (1.3-3.8)     | Nervous system disorders                             |
| Criminal activity                           | 12 | 12.4 (6.9-22.3)   | Psychiatric disorders                                |
| Oral dryness and saliva altered             | 11 | 1.8 (1.0-3.3)     | Gastrointestinal disorders                           |
| Eyelid movement disorders                   | 10 | 3.9 (2.1-7.2)     | Eye disorders                                        |
| Dyspeptic signs and symptoms                | 10 | 4.7 (2.5-8.7)     | Gastrointestinal disorders                           |
| Anxiety disorders NEC                       | 10 | 14.8 (7.8-28.3)   | Psychiatric disorders                                |
| Stereotypies and automatisms                | 9  | 4.4 (2.3-8.5)     | Psychiatric disorders                                |
| Absence seizures                            | 9  | 2.5 (1.3-4.9)     | Nervous system disorders                             |
| Vasculitides NEC                            | 7  | 2.6 (1.2-5.5)     | Vascular disorders                                   |
| Impulse control disorders                   | 7  | 6.1 (2.9-12.9)    | Psychiatric disorders                                |
| Lacrimation disorders                       | 6  | 2.4 (1.1-5.3)     | Eye disorders                                        |
| Product dispensing errors and issues        | 5  | 2.9 (1.2-6.9)     | Injury, poisoning and procedural complications       |
| Panniculitides                              | 5  | 4.8 (2.0-11.8)    | Skin and subcutaneous tissue disorders               |
| Neurological disorders congenital NEC       | 5  | 3.7 (1.5-9.0)     | Nervous system disorders                             |
| Dental and periodontal infections and       | 5  | 8.1 (3.3-19.9)    | Gastrointestinal disorders                           |

|                                                             |     |                  |                                                      |
|-------------------------------------------------------------|-----|------------------|------------------------------------------------------|
| inflammations                                               |     |                  |                                                      |
| Bleeding tendencies                                         | 5   | 6.1 (2.5-14.8)   | Blood and lymphatic system disorders                 |
| <b>Omalizumab (ATC code: R03DX05)</b>                       |     |                  |                                                      |
| Bronchospasm and obstruction                                | 212 | 23.8 (21.2-26.8) | Respiratory, thoracic and mediastinal disorders      |
| Breathing abnormalities                                     | 92  | 3.3 (2.7-4.0)    | Respiratory, thoracic and mediastinal disorders      |
| Anaphylactic and anaphylactoid responses                    | 86  | 7.0 (5.8-8.6)    | Immune system disorders                              |
| Urticarias                                                  | 64  | 2.7 (2.2-3.5)    | Immune system disorders                              |
| Asthenic conditions                                         | 61  | 2.2 (1.7-2.7)    | Psychiatric disorders                                |
| Headaches NEC                                               | 59  | 2.4 (1.9-3.1)    | Nervous system disorders                             |
| Pruritus NEC                                                | 56  | 3.8 (2.9-4.9)    | Skin and subcutaneous tissue disorders               |
| Coughing and associated symptoms                            | 56  | 4.2 (3.3-5.4)    | Respiratory, thoracic and mediastinal disorders      |
| Allergic conditions NEC                                     | 55  | 5.3 (4.1-6.8)    | Immune system disorders                              |
| Pain and discomfort NEC                                     | 54  | 3.2 (2.5-4.2)    | General disorders and administration site conditions |
| Upper respiratory tract signs and symptoms                  | 45  | 4.7 (3.6-6.3)    | Respiratory, thoracic and mediastinal disorders      |
| Neurological signs and symptoms NEC                         | 38  | 1.6 (1.2-2.2)    | Nervous system disorders                             |
| Upper respiratory tract infections                          | 32  | 2.6 (1.8-3.6)    | Infections and infestations                          |
| Erythemas                                                   | 32  | 1.9 (1.3-2.6)    | Skin and subcutaneous tissue disorders               |
| Exposures associated with pregnancy, delivery and lactation | 29  | 2.2 (1.6-3.2)    | Injury, poisoning and procedural complications       |
| Feelings and sensations NEC                                 | 27  | 2.5 (1.7-3.6)    | General disorders and administration site conditions |
| Angioedemas                                                 | 25  | 2.8 (1.9-4.1)    | Immune system disorders                              |
| Peripheral vascular disorders NEC                           | 24  | 5.7 (3.8-8.5)    | Vascular disorders                                   |
| Musculoskeletal and connective tissue pain and discomfort   | 24  | 2.2 (1.5-3.3)    | Musculoskeletal and connective tissue disorders      |
| Lower respiratory tract and lung infections                 | 24  | 2.6 (1.8-3.9)    | Infections and infestations                          |
| Physical examination procedures and organ system status     | 22  | 1.6 (1.0-2.4)    | Investigations                                       |
| Immunoglobulin analyses                                     | 20  | 43.8 (27.9-68.6) | Investigations                                       |
| Joint related signs and symptoms                            | 18  | 2.5 (1.6-4.0)    | Musculoskeletal and connective tissue disorders      |
| Dermatitis and eczema                                       | 18  | 3.3 (2.1-5.2)    | Skin and subcutaneous tissue disorders               |
| Paraesthesias and dysaesthesias                             | 16  | 2.4 (1.5-3.9)    | Nervous system disorders                             |
| Oral soft tissue swelling and oedema                        | 16  | 4.0 (2.5-6.6)    | Gastrointestinal disorders                           |

|                                                                |    |                  |                                                 |
|----------------------------------------------------------------|----|------------------|-------------------------------------------------|
| Gestational age and weight conditions                          | 15 | 2.9 (1.8-4.8)    | Pregnancy, puerperium and perinatal conditions  |
| Vascular tests NEC (incl blood pressure)                       | 14 | 3.4 (2.0-5.7)    | Investigations                                  |
| Ocular disorders NEC                                           | 14 | 3.0 (1.8-5.1)    | Eye disorders                                   |
| Vascular hypotensive disorders                                 | 12 | 1.9 (1.1-3.3)    | Vascular disorders                              |
| Heart rate and pulse investigations                            | 12 | 3.1 (1.8-5.5)    | Investigations                                  |
| Gastrointestinal signs and symptoms NEC                        | 12 | 3.3 (1.9-5.8)    | Gastrointestinal disorders                      |
| Visual disorders NEC                                           | 11 | 2.0 (1.1-3.6)    | Eye disorders                                   |
| Nasal congestion and inflammations                             | 11 | 8.6 (4.8-15.6)   | Respiratory, thoracic and mediastinal disorders |
| Tongue signs and symptoms                                      | 10 | 5.8 (3.1-10.8)   | Gastrointestinal disorders                      |
| Speech and language abnormalities                              | 9  | 2.2 (1.1-4.1)    | Nervous system disorders                        |
| Respiratory and pulmonary function diagnostic procedures       | 9  | 32.1 (16.5-62.6) | Investigations                                  |
| Non-site specific injuries NEC                                 | 9  | 1.9 (1.0-3.7)    | Injury, poisoning and procedural complications  |
| Ocular infections, inflammations and associated manifestations | 8  | 4.2 (2.1-8.3)    | Eye disorders                                   |
| Migraine headaches                                             | 8  | 5.6 (2.8-11.2)   | Nervous system disorders                        |
| Respiratory tract disorders NEC                                | 7  | 2.3 (1.1-4.7)    | Respiratory, thoracic and mediastinal disorders |
| Pharyngeal disorders (excl infections and neoplasms)           | 7  | 2.6 (1.2-5.5)    | Gastrointestinal disorders                      |
| Influenza viral infections                                     | 7  | 3.6 (1.7-7.6)    | Infections and infestations                     |
| Limb fractures and dislocations                                | 6  | 7.9 (3.6-17.7)   | Injury, poisoning and procedural complications  |
| Exfoliative conditions                                         | 6  | 3.1 (1.4-7.0)    | Skin and subcutaneous tissue disorders          |
| Allergies to foods, food additives, drugs and other chemicals  | 6  | 2.7 (1.2-6.0)    | Immune system disorders                         |
| Sensory abnormalities NEC                                      | 5  | 2.7 (1.1-6.5)    | Nervous system disorders                        |
| Red blood cell analyses                                        | 5  | 2.8 (1.2-6.8)    | Investigations                                  |
| Oral soft tissue pain and paraesthesia                         | 5  | 6.7 (2.8-16.3)   | Gastrointestinal disorders                      |
| Fractures and dislocations NEC                                 | 5  | 12.1 (5.0-29.2)  | Injury, poisoning and procedural complications  |
